# Supplementary material
Source: Springer Nature journal article supplement (https://www.springermedizin.de/resource/supplementary/12885_2011_2737_MOESM1_ESM.pdf/9461830)
Supplement: MOESM1 [file 9461830]

\_\_\_\_\_  
**Patient's name**

\_\_\_\_/\_\_\_\_/\_\_\_\_  
**Date of referral**

I will arrange for you to take part in  
a 12 week exercise program,  
supervised by exercise physiologists  
at the YMCA

\_\_\_\_\_  
This program includes  
2 YMCA sessions each week and  
1 home-based session

The program is free of charge and  
provided by Deakin University

\_\_\_\_\_  
**Doctor's signature**

\_\_\_\_\_  
**Doctor's name**
